# Supplementary material
Source: PubMed Central journal article supplement (PMC518762)
Supplement: pnas_101_38_13703__3.pdf [file pnas_101_38_13703__3.pdf]

**Table 2. Arsenic K-edge extended x-ray absorption fine-structure (EXAFS) fit results\***

|                                   | Atom | $N^\dagger$ | $R(\text{\AA})$ | $\sigma^2(\text{\AA}^2)$ |                         |      |                 |
|-----------------------------------|------|-------------|-----------------|--------------------------|-------------------------|------|-----------------|
| Sediment B                        | S    | 2           | 2.24            | 0.0029                   |                         |      |                 |
| ( $\chi^2 = 1.37$ )               | As   | 1           | 2.58            | 0.0031                   |                         |      |                 |
|                                   | As   | 2.5         | 3.49            | 0.0043                   |                         |      |                 |
|                                   | As   | 0.75        | 3.63            | 0.0114                   |                         |      |                 |
|                                   | S    | 2.5         | 3.65            | 0.0064                   |                         |      |                 |
| Reference compounds:              |      |             |                 |                          | Crystallographic values |      |                 |
|                                   | Atom | $N^\dagger$ | $R(\text{\AA})$ | $\sigma^2(\text{\AA}^2)$ | Atom                    | $N$  | $R(\text{\AA})$ |
| Realgar <sup>‡</sup>              | S    | 2           | 2.24            | 0.0034                   | S                       | 2    | 2.225-2.251     |
| (AsS)                             | As   | 1           | 2.58            | 0.0048                   | As                      | 1    | 2.565-2.579     |
| ( $\chi^2 = 0.54$ )               |      |             |                 |                          | S                       | 1    | 3.415-3.513     |
|                                   | As   | 2.5         | 3.47            | 0.0057                   | As                      | 2.5  | 3.439-3.499     |
|                                   |      |             |                 |                          | As                      | 0.5  | 3.562           |
|                                   | As   | 0.75        | 3.63            | 0.0118                   | As                      | 0.75 | 3.624-3.627     |
|                                   |      |             |                 |                          | S                       | 0.75 | 3.570-3.617     |
|                                   | S    | 2.5         | 3.67            | 0.0078                   | S                       | 2.5  | 3.657-3.689     |
| Orpiment <sup>§</sup>             | S    | 3           | 2.28            | 0.0040                   | S                       | 3    | 2.243-2.307     |
| (As <sub>2</sub> S <sub>3</sub> ) | As   | 1           | 3.19            | 0.0097                   | As                      | 1    | 3.191           |
| ( $\chi^2 = 0.24$ )               | S    | 1           | 3.22            | 0.0150                   | S                       | 1    | 3.219, 3.291    |
|                                   | S    | 1           | 3.47            | 0.0168                   | S                       | 1    | 3.475, 3.514    |
|                                   | As   | 1           | 3.52            | 0.0068                   | As                      | 1    | 3.521           |
|                                   | As   | 1           | 3.57            | 0.0111                   | As                      | 1    | 3.568           |
| Arsenolite <sup>¶</sup>           | O    | 3           | 1.80            | 0.0040                   | O                       | 3    | 1.787           |
| (As <sub>2</sub> O <sub>3</sub> ) | As   | 3           | 3.24            | 0.0035                   | As                      | 3    | 3.223           |
| ( $\chi^2 = 0.57$ )               | As   | 6           | 3.88            | 0.017                    | As                      | 6    | 3.946           |

\*EXAFS fit results for arsenic spectra shown in Fig. 1b;  $N$  is the number of backscattering atoms at distance ( $R$ );  $\sigma^2$ , the Debye–Waller term, is the absorber-backscatterer mean-square relative displacement.  $R$  and  $\sigma^2$  were varied in fits;  $N$  was fixed on crystallographic values.  $\chi^2$  is a reduced least-squares goodness-of-fit parameter [= ( $F$ -factor)/(# of points – # of variables)]. Based on empirical fits to reference

compounds, error in  $R$  is  $\pm 0.02 \text{ \AA}$ ; error in  $\sigma^2$  is  $\pm 25\%$  (1). Crystallographic values for reference compounds from independent x-ray diffraction analyses were taken from the literature.

<sup>†</sup>Fixed parameter.

<sup>‡</sup>Realgar structure from ref. 2; average of four unique arsenic sites. Disordered sulfur shells at 3.415-3.513  $\text{\AA}$  and 3.570-3.617  $\text{\AA}$  cancel and do not contribute to EXAFS amplitudes.

<sup>§</sup>Orpiment crystal structure from ref. 2; average of two unique arsenic site.

<sup>¶</sup>Arsenolite crystal structure from ref. 3; additional oxygen shells at 3.049  $\text{\AA}$  and 3.450  $\text{\AA}$  scatter too weakly to contribute to EXAFS amplitudes.

1 O'Day, P. A., Rehr, J. J., Zabinsky, S. I. & Brown, G. E., Jr. (1994) *J. Am. Chem. Soc.* **116**, 2938–2949.

2. Mullen, D. J. E. & Nowacki, W. (1972) *Z. Kristallogr.* **136**, 48–65.

3. Pertlik, F. (1978) *Czech J. Phys.* **28**, 170–176.
