# Supplementary material
Source: PubMed Central journal article supplement (PMC518762)
Supplement: pnas_101_38_13703__4.pdf [file pnas_101_38_13703__4.pdf]

**Table 3. Iron K-edge EXAFS fit results \***

| Nonsulfide component <sup>†</sup> |      |                  |                   |                   |                   | Sulfide component <sup>‡</sup> |                  |          |                   |                   |
|-----------------------------------|------|------------------|-------------------|-------------------|-------------------|--------------------------------|------------------|----------|-------------------|-------------------|
|                                   | Atom | <i>N</i>         | <i>R</i>          | $\sigma^2$        | $\Delta E_0$      | Atom                           | <i>N</i>         | <i>R</i> | $\sigma^2$        | $\Delta E_0$      |
|                                   |      |                  | (Å)               | (Å <sup>2</sup> ) | (eV)              |                                |                  | (Å)      | (Å <sup>2</sup> ) | (eV)              |
| Sed. A<br>$\chi^2 = 0.44$         | O    | 1.8 <sup>§</sup> | 2.01 <sup>§</sup> | 0.0050            | -1.0 <sup>§</sup> | S                              | 1.0 <sup>§</sup> | 2.25     | 0.0012            | -5.8 <sup>§</sup> |
|                                   | Fe   | 0.5 <sup>§</sup> | 3.08 <sup>§</sup> | 0.0050            |                   | S                              | 1.0 <sup>¶</sup> | 3.44     | 0.0066            |                   |
|                                   | Si   | 0.6 <sup>§</sup> | 3.26              | 0.0065            |                   | Fe                             | 2.0 <sup>¶</sup> | 3.82     | 0.0066            |                   |
| Sed. B<br>$\chi^2 = 0.35$         | O    | 2.1 <sup>§</sup> | 2.00 <sup>§</sup> | 0.0060            | -1.1 <sup>§</sup> | S                              | 0.7 <sup>§</sup> | 2.25     | 0.0012            | -6.9 <sup>§</sup> |
|                                   | Fe   | 0.7 <sup>§</sup> | 3.08 <sup>§</sup> | 0.0050            |                   | S                              | 0.7 <sup>¶</sup> | 3.44     | 0.0066            |                   |
|                                   | Si   | 0.6 <sup>§</sup> | 3.26              | 0.0065            |                   | Fe                             | 1.3 <sup>¶</sup> | 3.82     | 0.0100            |                   |
| Pyrite:                           | O    | 3.5 <sup>§</sup> | 2.01 <sup>§</sup> | 0.0072            | -0.3 <sup>§</sup> | S                              | 0.9 <sup>§</sup> | 2.25     | 0.0012            | -3.8 <sup>§</sup> |
| Illite                            | Al   | 1.7 <sup>§</sup> | 3.02 <sup>§</sup> | 0.0088            |                   | S                              | 0.9 <sup>¶</sup> | 3.44     | 0.0032            |                   |
| 50:50<br>$\chi^2 = 0.68$          | Fe   | 0.6 <sup>§</sup> | 3.02 <sup>§</sup> | 0.0059            |                   | Fe                             | 1.8 <sup>¶</sup> | 3.82     | 0.0027            |                   |
|                                   | Si   | 2.3 <sup>§</sup> | 3.26              | 0.0045            |                   |                                |                  |          |                   |                   |

\*EXAFS fit results for iron spectra shown in Fig. 1c; variables are as in Table 2.

<sup>†</sup>For sediment samples, the nonsulfide component represents a composite of Fe-bearing phyllosilicate and oxide minerals. Values for  $\sigma^2$  were fixed for all shells based on empirical fits to reference compounds of similar composition and structure; *R* and *N* were varied, except for the Fe-Si shell, which will covary with Fe shells if floated independently. This shell was fixed on a typical crystallographic distance for Fe-Si in phyllosilicates (see ref. 1).

<sup>‡</sup>Sulfide component: Interatomic distances (*R*) were fixed on crystallographic values from pyrite and  $\sigma^2$  was fixed on values determined from fits to several reference sulfide compounds; *N* for each shell was floated as a linked variable in proportions based on the known coordination in pyrite (see ref. 1).

<sup>§</sup>Parameter varied in least-squares fit.

<sup>¶</sup>Parameter linked to the above variable in a constant ratio.

1. O'Day, P. A., Rivera, N., Root, R. & Carroll, S. A. (2004) *Am. Mineral.* **89**, 572–585.
